# Supplementary material for: An Integrated Coral Reef Ecosystem Model to Support Resource Management under a Changing Climate
Source: PLoS One. 2015 Dec 16;10(12):e0144165. doi: 10.1371/journal.pone.0144165 (PMC4682628; doi:10.1371/journal.pone.0144165)
Supplement: S3 Table — (XLSX) [file pone.0144165.s003.xlsx]

## Sheet: Sheet1
S3 Table. Last three years of model output data for each scenario to estimate the interactive effect size of single compared to muliple stressors acting simultaneously.
Ecoystem Metrics
(1) ratio of calcifiers (=corals: CRS, CRN, and crustose coralline algae: CCA) to non-calcifiers(= algae: TURF, MA) in the benthic community
(2) mean trophic level of the community
(3) biomass apex predators (=benthis piscivores: FPB,TPB; mid-water piscivores: FPM; roving piscivores:FPR; rays: RAY; and sharks: SHR)
(4) biomass herbivores (=browsers: FHB,THB; grazers: FHG,THG; scrapers: FHS; excavators:FHE; detritivores: FDE; bumphead parrotfish: BHP)
(5) total biomass (= all living organisms)
(6) ratio of start to end biomass target sp. (target sp. are the ones whose name starts with "Target", humphead wrasse (HHW), BHP, mid-water piscivores, roving piscivores and sharks)
Individual stressors simulated
	Trophic Level			3.18	3.09	3.36	3.46	4	2	2	2.21	2.84	2.01	2	2	2.7	4.12	4.09	4.1	4.5	3.3	4.1	2.17
			time	Planktivores	Coralivores	Invertivores	Target invertivores	Humphead wrasse	Detritivores	Browsers	Target browsers	Grazers	Target grazers	Small-bodied parrotfish	Large-bodied parrotfish	Bumphead parrotfish	Benthic piscivores	Target benthic piscivores	Mid-water piscivores	Roving piscivores	Rays	Sharks	Turtles	CRS	CRN	BFF	BC	BM	BD	CEP	BG	BSS	ZD	ZH	ZC	TRF	MA	CCA	PS	PL	PB	BB	DL	DR	DC	DIN
control	biom 30-yrs		13870	412.021	39.3638	445.541	836.739	34.4372	76.7203	17.3894	219.641	559.504	479.025	785.938	238.779	7.49178	50.9289	260.077	40.0962	232.262	22.8218	153.045	121.875	6088.55	13258.9	20816.2	1308.13	1947.32	1165.68	2232.89	19.7438	11.9447	14737.4	1593.29	0.86418	9079.97	15423.3	4765.46	1713.34	15.7672	12.9883	1.04788	155.452	123.194	0	122151
			14235	462.746	39.0692	443.54	834.703	34.4424	76.7642	17.3864	219.289	558.909	478.552	786.549	239.09	7.79763	50.9321	259.56	39.7686	231.347	22.8411	153.19	122.688	6205.89	13320.9	20756.1	1307.74	1930.73	1129.06	2220.83	19.6494	11.8756	15895.1	2905.9	1.40715	9004.51	15314.5	4826.19	2308.49	15.9235	17.3745	3.77566	230.845	187.898	0	121272
			14600	510.06	38.7964	442.171	832.506	34.4376	76.7124	17.398	219.308	558.655	478.62	788.275	239.348	8.11459	51.1012	259.286	39.9482	230.628	22.8725	153.196	123.554	6353.82	13470.8	20991.2	1292.48	1979.76	1127.09	2205.52	19.7391	11.8204	16763	1081.52	0.688255	8951.78	15505.2	4922.31	959.68	15.5134	8.05726	0.707759	95.847	110.107	0	122009
		ave		486.403	38.9328	442.856	833.605	34.44	76.7383	17.3922	219.298	558.782	478.586	787.412	239.219	7.95611	51.0167	259.423	39.8584	230.987	22.8568	153.193	123.121	6279.86	13395.9	20873.6	1300.11	1955.24	1128.08	2213.17	19.6943	11.848	16329.1	1993.71	1.0477	8978.15	15409.8	4874.25	1634.09	15.7185	12.7159	2.24171	163.346	149.003	0	121641
		%total		0.0976918	0.00781947	0.0889455	0.167426	0.00691712	0.0154125	0.00349314	0.0440451	0.112229	0.0961217	0.158148	0.048046	0.00159795	0.0102465	0.0521039	0.00800538	0.0463927	0.00459069	0.0307681		24550	24388	1.00664
control	biom 60-yrs		26280	808.824	39.5396	548.564	909.141	36.1559	64.4858	18.0814	217.819	555.235	479.369	814.127	253.248	17.642	48.9584	299.742	30.6906	230.101	23.8665	156.531	163.527	9604.26	14532.4	22110.9	2142.24	1673.69	771.331	2368.72	18.4198	10.7623	62906.6	0.747528	0.304913	7158.89	15092.1	5657.5	1806.4	14.1658	12.5505	0.929652	142.362	190.463	0	99016.1
			26645	813.898	39.8909	552.983	913.536	36.2152	64.4215	18.0847	218.049	555.202	479.44	812.938	253.305	17.8431	49.3501	301.076	30.5268	229.895	23.8899	156.271	164.838	9627.87	14441.8	22062.3	2158.73	1661.76	748.993	2387.12	18.4342	10.7612	65916.7	18.2977	0.397524	7087.01	15192.5	5673.16	1926.85	14.1619	13.9392	0.892721	159.541	192.692	0	100684
			26999.5	807.82	39.8619	549.962	905.129	35.889	63.8567	17.9097	216.301	548.722	475.432	803.974	250.376	17.8939	48.5521	297.604	30.0071	227.517	23.679	154.512	166.04	9671.1	14384.2	22142.2	2163.78	1650.82	728.09	2400.12	18.4595	10.7557	69882.3	66.8622	0.844224	7038.38	15306.7	5690.84	4399.24	14.1236	9.52662	0.926157	113.489	189.108	0	97673.1
		ave		810.181	39.7641	550.503	909.269	36.0867	64.2547	18.0253	217.39	553.053	478.08	810.346	252.31	17.793	48.9535	299.474	30.4082	229.171	23.8118	155.772	164.802	9634.41	14452.8	22105.1	2154.92	1662.09	749.471	2385.32	18.4378	10.7597	66235.2	28.6358	0.515554	7094.76	15197.1	5673.83	2710.83	14.1504	12.0055	0.916177	138.464	190.754	0	99124.4
		%total		0.14612	0.00717163	0.0992855	0.16399	0.00650838	0.0115886	0.00325093	0.0392071	0.0997454	0.0862237	0.146149	0.0455051	0.00320904	0.00882898	0.0540114	0.00548424	0.041332	0.00429455	0.0280941		29761.1	22291.9	1.33506
Climate Change	biom 30-yrs		13870	428.855	39.2811	445.035	834.716	34.1617	76.6952	17.3541	218.944	557.356	478.982	779.948	237.342	7.47452	51.0757	259.612	40.2326	231.696	22.7164	152.691	121.368	4882.23	12448.1	20337.3	1304.54	1920.05	1069.03	2151.61	19.8565	11.8167	15056.2	2256.49	1.26036	9114.24	15551.6	4785.4	2518.19	16.0669	12.7649	2.40595	164.795	157.858	0	123703
			14235	478.223	39.2324	443.614	834.328	34.1914	76.7427	17.389	219.422	556.584	479.153	782.264	237.395	7.78326	51.255	259.32	40.2345	230.98	22.7231	152.875	122.215	4952.91	12514.1	20338.3	1299.74	1932.86	1049.73	2137.82	19.8459	11.7478	15787.1	958.508	0.711175	9041.91	15535.3	4862.72	1277.78	15.9266	9.33361	0.785982	111.216	113.948	0	125971
			14600	521.233	39.1047	442.33	833.462	34.2461	76.7031	17.4178	219.716	556.004	479.448	783.812	237.381	8.09738	51.603	259.087	40.3444	230.467	22.7429	152.939	123.145	4794.61	12580.7	21315.2	1308.15	1960.65	1307.78	2173.26	20.0137	11.6765	16687.4	2061.31	1.33791	8996.89	15921.3	4987.05	600.996	15.3341	7.12386	0.582068	84.2839	109.598	0	118787
		ave		476.104	39.2061	443.66	834.169	34.1997	76.7137	17.3869	219.361	556.648	479.194	782.008	237.373	7.78505	51.3113	259.34	40.2705	231.048	22.7275	152.835	122.243	4876.58	12514.3	20663.6	1304.14	1937.85	1142.18	2154.23	19.9054	11.747	15843.6	1758.77	1.10315	9051.01	15669.4	4878.39	1465.66	15.7759	9.7408	1.258	120.098	127.135	0	122820
		%total		0.0959627	0.00790232	0.0894234	0.168134	0.00689324	0.0154623	0.00350449	0.044214	0.112197	0.0965856	0.15762	0.0478445	0.00156914	0.0103422	0.0522722	0.00811686	0.0465696	0.00458092	0.0308052		22269.3	24720.4	0.900846
Climate Change	biom 60-yrs		26280	728.681	46.8716	436.492	870.527	31.5171	63.512	16.7841	229.177	591.458	496.343	729.723	222.996	17.5999	54.7481	278.572	41.9826	232.414	22.0118	151.858	162.465	0.027213	17.9124	33954.9	1376.3	1694.58	1000.81	2144.09	23.1632	6.09085	27190.3	3303.85	1.99887	7855.93	20163.6	6714.26	505.002	10.9021	7.87365	1.52599	96.6428	195.386	0	152114
			26645	706.522	46.8625	436.824	873.684	31.5411	63.3969	16.7876	229.158	591.83	496.386	727.844	222.896	17.826	54.8759	280.406	42.2672	232.229	22.0287	151.221	163.827	0.010535	12.669	34740.4	1378.43	1707.92	1038.12	2158.41	23.2826	6.11793	26188.6	2007.93	1.50086	7806.39	20355.2	6743.33	440.287	10.9381	5.17692	0.607734	58.5517	167.742	0	154363
			26999.5	699.422	46.2791	432.228	865.729	31.2525	62.8204	16.6225	226.847	584.4	491.938	717.379	220.114	17.8958	53.7673	278.191	42.0479	230.101	21.8262	149.081	165.073	0.003279	8.07382	35323.6	1396.67	1704.99	1044.33	2173.67	23.2957	6.12977	28647.1	2412.04	1.61952	7764.79	20384.8	6754.68	406.253	10.7493	5.44208	0.749956	62.5193	174.182	0	152931
		ave		711.542	46.6711	435.181	869.98	31.4369	63.2431	16.7314	228.394	589.229	494.889	724.982	222.002	17.7739	54.4638	279.057	42.0993	231.581	21.9556	150.72	163.788	0.0136757	12.8851	34673	1383.8	1702.49	1027.75	2158.72	23.2471	6.11285	27342	2574.61	1.70642	7809.04	20301.2	6737.42	450.514	10.8632	6.16422	0.961227	72.5712	179.103	0	153136
		%total		0.136	0.00892043	0.0831779	0.166283	0.00600866	0.0120879	0.00319794	0.0436538	0.112622	0.0945901	0.138569	0.0424321	0.00339719	0.0104099	0.0533372	0.0080466	0.0442631	0.00419646	0.0288078		6750.32	28110.2	0.240138
LBSP	biom 30-yrs		13870	544.685	39.3629	428.051	693.675	25.3847	74.5216	18.6627	224.833	575.095	499.376	782.268	233.149	6.7938	36.3738	239.856	12.7026	158.48	21.4608	131.734	130.954	4786.94	9518	15465.7	1697.37	2021.2	260.543	2258.85	21.901	11.4292	4197.92	1.7e-05	6057.12	9454.86	17886.5	5467.17	1697.91	34.6727	13.0415	0.784192	153.043	95.9684	0	392753
			14235	586.853	39.02	425.67	693.228	25.4624	74.5109	18.7051	224.633	574.954	498.883	782.465	233.201	7.00325	35.9327	240.078	12.0732	157.184	21.4883	131.654	130.737	4875.34	9555.03	16282	1706.37	2196.37	568.102	2217.35	21.9218	11.366	4396.4	1.3e-05	15486.9	9405.45	17991.8	5523.69	733.271	31.5771	7.61083	0.508456	89.6937	81.8733	0	377940
			14599.5	537.544	38.6758	422.999	692.244	25.5604	74.4388	18.7501	224.534	574.98	498.553	782.635	233.25	7.2127	35.6044	240.208	11.3488	156.932	21.5591	131.612	130.848	4956.77	9574.25	16372.9	1683.12	2153.45	545.034	2210.78	21.8899	11.3072	3824.21	1.9e-05	5826.85	9333.1	17936.4	5538.37	2401.86	33.3139	16.4387	1.31614	204.376	110.981	0	378999
		ave		556.361	39.0196	425.573	693.049	25.4692	74.4904	18.706	224.667	575.01	498.937	782.456	233.2	7.00325	35.9703	240.048	12.0415	157.532	21.5027	131.667	130.846	4873.02	9549.09	16040.2	1695.62	2123.67	457.893	2228.99	21.9042	11.3674	4139.51	1.63333e-05	9123.64	9397.8	17938.2	5509.74	1611.01	33.1879	12.3637	0.869597	149.038	96.2743	0	383231
		%total		0.117062	0.00820998	0.0895435	0.145822	0.00535888	0.0156733	0.00393586	0.0472714	0.120986	0.10498	0.164634	0.0490668	0.00147353	0.00756838	0.0505076	0.00253362	0.0331458	0.00452432	0.0277036		19931.9	27336	0.729142
LBSP	biom 60-yrs		26280	799.882	36.2857	373.633	705.787	29.4857	64.0107	18.7804	222.101	564.917	486.21	791.177	242.073	14.3642	36.3907	241.379	12.0365	185.655	23.0418	145.5	201.4	7748.71	10666.8	28032.4	1798.85	2195.32	5343.9	4143.25	20.5494	10.2996	39394.2	1.6e-05	8867.13	7457.16	18059.5	6343.57	1119.18	7.15012	15.5152	0.933409	180.915	186.047	0	421494
			26645	820.158	36.5459	374.195	707.196	29.4778	63.6603	18.7169	221.373	564.263	485.361	789.139	242.744	14.5116	36.5865	240.756	11.9464	184.527	23.0515	145.527	206.217	7849.15	10712.4	29925.3	1707.3	2166.24	6205.76	4225.36	20.4505	10.3079	42060.5	1.6e-05	7290.19	7412.28	17990.1	6329.91	1432.75	6.45014	12.6929	0.934079	154.44	174.258	0	420213
			26999.5	814.631	36.4805	370.454	698.663	29.1702	62.8696	18.4736	218.819	557.315	480.381	779.355	240.532	14.5377	35.7589	236.225	11.6663	181.574	22.8399	144.118	210.835	7948.01	10759.9	32821.8	1640.97	2149.57	6593.41	4250.47	20.355	10.3309	42465	2.5e-05	7778.66	7368.97	17903	6313.32	1950.29	5.75327	21.7141	2.72664	280.655	212	0	413579
		ave		811.557	36.4374	372.761	703.882	29.3779	63.5135	18.657	220.764	562.165	483.984	786.557	241.783	14.4712	36.2454	239.453	11.8831	183.919	22.9778	145.048	206.151	7848.62	10713	30259.9	1715.71	2170.38	6047.69	4206.36	20.4516	10.3128	41306.6	1.9e-05	7978.66	7412.8	17984.2	6328.93	1500.74	6.45118	16.6407	1.53138	205.337	190.768	0	418429
		%total		0.162786	0.00730876	0.0747699	0.141188	0.00589274	0.0127398	0.00374229	0.0442819	0.112761	0.0970796	0.157771	0.0484978	0.0029027	0.00727025	0.0480306	0.00238355	0.0368912	0.00460898	0.0290944		24890.6	25397	0.98006
Fishery	biom 30-yrs		13870	297.796	40.0618	467.411	390.712	6.25315	78.2791	15.5703	65.7846	561.382	352.845	755.888	161.661	0.007664	38.7007	225.481	51.8255	139.086	23.1019	19.7279	170.19	6053.58	13199.7	21231.8	1314.5	1912.07	1433.8	2289.62	18.844	11.9943	11877.9	1256.37	0.725382	9181.26	14118.5	4602.45	1277.03	16.7007	9.94065	0.775405	118.131	105.097	0	119940
			14235	342.249	39.7371	465.482	390.478	6.23721	78.5509	15.6039	65.9619	560.88	352.868	757.483	161.998	0.008228	38.6753	225.247	51.3031	139.722	23.1689	19.6469	173.744	6180.56	13288.6	21262.5	1312.14	1936.68	1424.53	2272.5	18.8503	11.9341	13319.2	878.763	0.63103	9109.25	14135.4	4733.88	1388.55	16.6873	9.64754	0.744878	115.255	104.818	0	119752
			14600	382.665	39.4343	464.059	390.236	6.24518	78.6767	15.6313	66.1123	560.524	352.978	759.1	162.283	0.009087	38.7198	225.188	51.0386	140.412	23.2544	19.59	177.447	6313.21	13390.2	21387.6	1310.96	1928.58	1483.18	2263.32	18.8254	11.8867	14014.1	1065.92	0.670153	9041.14	14106.5	4846.19	1272.42	16.4429	10.3871	0.870288	124.017	106.354	0	118836
		ave		340.903	39.5857	464.771	390.357	6.24119	78.6138	15.6176	66.0371	560.702	352.923	758.292	162.14	0.0086575	38.6975	225.217	51.1708	140.067	23.2117	19.6184	175.596	6246.89	13339.4	21325.1	1311.55	1932.63	1453.85	2267.91	18.8378	11.9104	13666.7	972.339	0.650591	9075.2	14121	4790.03	1330.48	16.5651	10.0173	0.807583	119.636	105.586	0	119294
		%total		0.0912928	0.0106009	0.124464	0.104536	0.00167137	0.0210525	0.00418234	0.0176845	0.150154	0.0945117	0.203068	0.0434207	2.31845e-06	0.0103631	0.0603125	0.0137034	0.0375095	0.00621601	0.00525376		24376.3	23196.2	1.05088
Fishery	biom 60-yrs		26280	739.332	39.775	568.155	424.982	6.832	66.7903	15.5966	64.0129	556.665	345.578	791.233	168.039	0.008447	41.4074	259.214	46.8543	145.621	24.3772	19.7428	288.083	9562.08	14402	24572.6	2181.12	1629.4	1419.46	2536.63	17.543	10.9108	65654	232.483	0.514879	7184.88	13878	5683.92	1198.05	13.8671	9.96762	0.707038	111.755	186.364	0	91255.6
			26645	746.41	40.0773	572.016	426.1	6.83941	66.625	15.5652	63.931	556.893	345.555	791.374	168.005	0.006945	41.5801	259.871	46.4279	145.272	24.3949	19.7192	290.514	9608.38	14340.5	24661.7	2189.38	1618.04	1426.49	2560.49	17.587	10.9045	67649.9	1.02335	0.246011	7110.36	14014.3	5696.51	1471.49	15.0373	10.8352	0.704297	123.413	179.202	0	92322.5
			26999.5	750.33	40.0008	569.212	422.65	6.79046	65.9488	15.4009	63.4293	550.768	342.732	783.847	166.163	0.007183	40.8405	256.686	45.4091	143.669	24.1775	19.5394	292.634	9629.35	14252.1	24650.7	2199.48	1604.59	1396.82	2575.36	17.6028	10.9024	70573.9	0.049974	0.371462	7040.96	14113.4	5700.86	1238.73	14.9033	9.85626	0.618076	111.157	181.495	0	94082.4
		ave		745.357	40.039	570.614	424.375	6.81494	66.2869	15.483	63.6802	553.831	344.143	787.61	167.084	0.007064	41.2103	258.279	45.9185	144.47	24.2862	19.6293	291.574	9618.86	14296.3	24656.2	2194.43	1611.32	1411.65	2567.92	17.5949	10.9034	69111.9	0.536663	0.308737	7075.66	14063.9	5698.68	1355.11	14.9703	10.3457	0.661186	117.285	180.349	0	93202.5
		%total		0.172572	0.00927019	0.132113	0.098255	0.00157785	0.0153473	0.00358477	0.0147438	0.128228	0.0796791	0.182354	0.0386847	1.63552e-06	0.00954137	0.0597989	0.0106314	0.033449	0.00562295	0.00454475		29613.9	21139.5	1.40088
3 cumulative stressors simulated simultaneously
CC+LBSP+fishing	biom 30-yrs		13870	536.488	40.4412	443.023	326.63	5.24458	76.1056	16.7504	68.2272	574.367	368.565	748.551	156.822	0.007617	30.6559	210.072	22.8431	106.482	21.5272	16.7346	189.454	3831.76	8985.49	16857.6	1775	2186.76	450.152	2345.18	21.4684	11.3752	3908.75	1.4e-05	19396.1	9521.77	17161.7	5540.84	1022.62	31.2765	18.9072	2.13191	234.137	95.9572	0	376472
			14235	592.069	40.3459	440.943	327.04	5.22249	76.1906	16.8368	68.3351	573.943	368.647	749.802	156.858	0.008347	30.726	210.588	22.2211	108.023	21.5673	16.6826	191.8	3855.64	9000.42	17008.1	1835.79	2179.18	445.911	2368.27	21.5658	11.3091	3086.54	1.3e-05	12981.5	9463.44	17319.2	5611.09	847.753	32.0087	8.14727	0.529366	97.5026	82.589	0	391220
			14600	549.114	40.1062	439.014	326.987	5.20118	76.1972	16.8954	68.4099	573.406	368.653	749.853	156.847	0.009278	30.5291	210.976	21.0886	109.193	21.6327	16.6049	194.378	3688.24	8929.32	17082.5	1849.15	2149.88	446.958	2387.1	21.5147	11.2349	5502.27	1.7e-05	7717.84	9392.11	17242.2	5634.52	1325.97	32.6429	12.0434	0.834084	141.452	93.7677	0	387314
		ave		559.224	40.226	439.978	327.013	5.21184	76.1939	16.8661	68.3725	573.675	368.65	749.827	156.853	0.0088125	30.6275	210.782	21.6548	108.608	21.6	16.6437	193.089	3771.94	8964.87	17045.3	1842.47	2164.53	446.434	2377.69	21.5403	11.272	4294.4	1.5e-05	10349.6	9427.78	17280.7	5622.81	1086.86	32.3258	10.0953	0.681725	119.477	88.1783	0	389267
		%total		0.147474	0.0106081	0.116028	0.0862374	0.00137442	0.0200933	0.00444779	0.0180306	0.151285	0.0972173	0.197738	0.041364	2.32396e-06	0.00807685	0.0555857	0.00571064	0.0286412	0.00569618	0.00438916		18359.6	26708.5	0.687408
CC+LBSP+fishing	biom 60-yrs		26280	628.12	47.8697	423.428	371.005	5.53565	67.2377	16.673	66.5752	601.424	371.748	709.567	146.479	0.009213	35.0179	233.053	19.9732	126.951	22.5804	16.9487	339.597	0.026132	18.072	37496.1	2738.94	2457.58	2015.52	3882.83	23.7465	6.08901	16269.5	0.001723	15241.6	7963.17	20969	7150.71	885.439	5.73184	31.1447	1.40491	345.423	245.086	0	405529
			26645	625.398	47.7963	421.726	372.289	5.57445	66.7216	16.6381	66.511	601.378	371.825	707.865	146.362	0.008304	35.4721	233.252	20.0417	127.543	22.6605	17.0267	349.396	0.010239	12.757	38199.3	2603.01	2456.91	2297.15	4052.19	23.6532	6.12653	15355.9	0.002364	13530.4	7912.31	20934.7	7165.21	956.768	5.43565	17.7408	0.923489	205.452	240.211	0	403485
			26999.5	598.925	47.0879	414.69	368.709	5.55674	65.7429	16.4503	65.9946	593.493	368.691	698.031	144.643	0.007165	35.1229	229.6	19.8352	126.531	22.4769	16.9263	358.294	0.003239	8.15163	39229.7	2454.81	2456.53	2697.64	4117.2	23.5847	6.15253	16021.1	0.004307	11949.6	7864.11	20898	7178.95	1623.61	4.88919	27.4168	1.41511	329.073	246.592	0	402622
		ave		617.481	47.4421	418.208	370.499	5.5656	66.2323	16.5442	66.2528	597.435	370.258	702.948	145.502	0.0077345	35.2975	231.426	19.9385	127.037	22.5687	16.9765	353.845	0.006739	10.4543	38714.5	2528.91	2456.72	2497.39	4084.7	23.6189	6.13953	15688.5	0.0033355	12740	7888.21	20916.4	7172.08	1290.19	5.16242	22.5788	1.1693	267.262	243.402	0	403053
		%total		0.159242	0.0122348	0.107852	0.095548	0.00143531	0.0170806	0.00426658	0.0170859	0.154073	0.0954858	0.181283	0.0375236	1.99465e-06	0.00910287	0.0596825	0.00514194	0.0327616	0.00582025	0.00437808		7182.54	28804.6	0.249354
2 cumulative stressors simulated simultaneously
CC,Fish	biom 30-yrs		13870	283.71	39.7413	463.848	388.781	6.20361	78.0098	15.57	65.708	561.035	353.256	746.263	160.495	0.007717	38.7493	225.164	52.0649	138.966	22.975	19.6948	169.441	4564.44	12288.5	21644	1298.48	1906.55	1575.42	2336.25	19.036	11.8666	11957.3	2430.13	1.3993	9223.92	14409.5	4632.33	781.971	15.3497	7.38178	0.70053	88.0341	103.187	0	121428
			14235	312.539	39.6768	461.562	388.435	6.20142	78.335	15.6211	66.0043	560.11	353.598	748.909	160.621	0.0085	38.7327	224.813	51.7468	139.803	22.9992	19.6451	173.03	4635.55	12354.7	21687.2	1298.32	1886.93	1552.32	2329.17	19.0769	11.8036	12316.9	1524.47	0.845558	9140.25	14437.6	4756.16	1147.26	16.0216	9.25769	0.855112	111.348	108.934	0	123299
			14600	346.286	39.5147	459.384	388.011	6.19197	78.495	15.6491	66.184	559.089	353.822	750.004	160.666	0.009494	38.8323	224.563	51.5256	140.44	23.0327	19.5878	176.59	4464.46	12358.2	21745.2	1297.7	1869.89	1564.07	2321.48	19.0585	11.7259	13418.4	1210.24	0.751997	9066.04	14401.8	4872.81	1253.68	16.2899	9.96372	0.843381	118.636	110.846	0	124544
		ave		314.178	39.5958	460.473	388.223	6.1967	78.415	15.6351	66.0942	559.6	353.71	749.457	160.644	0.008997	38.7825	224.688	51.6362	140.121	23.016	19.6164	174.81	4550.01	12356.5	21716.2	1298.01	1878.41	1558.2	2325.33	19.0677	11.7647	12867.7	1367.35	0.798778	9103.15	14419.7	4814.48	1200.47	16.1558	9.6107	0.849247	114.992	109.89	0	123922
		%total		0.0851411	0.0107303	0.124786	0.105207	0.00167928	0.0212501	0.00423705	0.0179113	0.151649	0.095854	0.2031	0.0435338	2.43815e-06	0.0105099	0.0608897	0.0139932	0.0379723	0.00623724	0.00531597		21721	23522.9	0.923398
CC,Fish	biom 60-yrs		26280	653.981	48.6677	467.743	410.272	6.27585	65.3314	14.71	64.3366	598.103	357.673	689.1	142.987	0.00826	45.8411	248.953	64.1133	148.333	22.7019	19.1372	289.127	0.007555	8.21201	36509.1	1417.6	1643.82	1647.48	2388.12	22.219	6.42005	27002.5	2080.02	1.49202	7819.54	18793.9	6663.31	431.126	12.5346	6.04951	0.589633	67.6532	169.318	0	151915
			26645	657.009	48.7332	468.588	412.074	6.3001	65.1503	14.7053	64.3021	598.327	357.698	686.4	142.808	0.006839	45.8334	250.565	64.3357	148.222	22.7315	19.1051	291.959	0.002852	5.37056	37157.9	1432.44	1638.01	1652.15	2416.92	22.2334	6.44466	27889.2	2060.73	1.42367	7774.86	18838.6	6674.93	453.758	12.4308	5.45594	0.588783	61.7475	169.598	0	151906
			26999.5	628.818	48.2315	464.342	409.024	6.27259	64.5041	14.5584	63.808	590.705	354.649	676.361	141.078	0.007166	44.8826	248.076	63.6808	146.837	22.528	18.9107	294.307	0.000892	3.20329	37737.6	1438.12	1630.66	1655.78	2436.64	22.2482	6.46556	26861	1909.51	1.44847	7735.04	18887.8	6680.27	479.173	12.3288	5.29649	0.575324	60.1976	167.219	0	153822
		ave		646.603	48.4823	466.465	410.549	6.28635	64.8272	14.6318	64.0551	594.516	356.173	681.38	141.943	0.0070025	45.358	249.321	64.0083	147.53	22.6297	19.0079	293.133	0.001872	4.28692	37447.7	1435.28	1634.34	1653.97	2426.78	22.2408	6.45511	27375.1	1985.12	1.43607	7754.95	18863.2	6677.6	466.466	12.3798	5.37621	0.582054	60.9725	168.408	0	152864
		%total		0.159901	0.0119894	0.115354	0.101526	0.00155457	0.0160314	0.00361836	0.0158404	0.14702	0.0880795	0.168501	0.0351017	1.73167e-06	0.0112167	0.0616554	0.0158288	0.0364832	0.00559619	0.00470054		6681.89	26618.1	0.251028
Fish, LBSP	biom 30-yrs		14235	433.762	40.1106	442.326	329.048	5.24209	76.0871	16.8338	68.2151	575.681	368.706	753.412	157.429	0.009189	30.2252	212.45	22.5868	107.525	21.8374	16.6806	192.189	4891.92	9573.99	16978.6	1728.69	2202.58	498.797	2286.39	21.1942	11.4397	6680.9	4.7e-05	9305.13	9417.87	16713.6	5481.39	3780.05	33.0308	48.1019	10.7062	639.766	282.298	0	377269
			14600	446.554	39.8136	440.97	330.683	5.26091	75.9705	16.8866	68.2166	575.405	368.542	753.471	157.518	0.008478	29.9057	213.613	22.4505	108.743	22.0012	16.6556	195.579	4982.21	9615.58	17799.1	1730.3	2237.64	802.884	2294.95	21.1319	11.396	5579.68	1.6e-05	7048.02	9357.35	16679.9	5514.55	1409.78	32.5688	11.7762	0.732991	138.394	88.7865	0	368902
			14965	429.591	39.5534	439.872	333.106	5.2844	75.7693	16.9343	68.1931	575.253	368.286	753.428	157.592	0.007542	29.5922	215.093	22.4836	110.092	22.1879	16.6611	199.294	5072.94	9654.19	18224.1	1718.56	2429.37	830.726	2321.25	21.0051	11.3596	3630.15	1.6e-05	10591.7	9290.2	16559.1	5530.73	1296.86	31.1588	15.3307	2.01516	191.614	117.16	0	364505
		ave		424.7	39.309	438.953	336.085	5.32031	75.4834	16.9715	68.1517	575.243	367.936	753.217	157.66	0.008027	29.3712	216.7	23.1973	111.388	22.3609	16.6845	203.212	5158.12	9686.57	18677.9	1788.58	2432.45	820.389	2364.17	20.9165	11.3147	5587.07	2.1e-05	7113.01	9220.64	16471.9	5551.83	2257.82	31.433	36.851	3.49594	444.421	134.447	0	364161
		%total		0.115447	0.0106854	0.119322	0.0913586	0.00144623	0.0205188	0.0046134	0.0185258	0.156369	0.100017	0.204749	0.042857	2.182e-06	0.00798405	0.0589061	0.00630579	0.0302789	0.00607842	0.00453538
LOW Phytoplankton Growth Rate
control	biom 30-yrs		13870	413.594	41.3554	480.845	822.59	27.0234	72.6572	17.4911	218.782	558.192	479.862	770.778	241.498	7.32486	48.7588	273.403	34.3645	201.387	22.2791	144.291	117.894	6479.67	12977.6	14819.5	1416.06	1778.79	594.548	1950.01	20.1491	12.0733	13435.2	1693.86	0.947845	8776.37	15867.1	5235.07	1352.43	15.7329	8.95548	0.631314	103.582	109.98	0	223437
			14235	416.697	41.2146	480.293	821.99	26.9566	72.4344	17.4795	218.64	557.47	478.592	770.889	242.147	7.60085	48.3676	273.649	33.3184	200.155	22.3443	144.191	118.956	6603.92	13012.7	14619.8	1427.13	1757.44	582.884	1941.58	20.0889	12.0174	13715.8	1147.06	0.830008	8690.41	15808.9	5242.02	2351.22	15.7993	16.5946	1.41395	195.539	153.439	0	227486
			14600	429.671	41.1056	479.973	821.648	26.8918	72.1344	17.493	218.675	556.921	477.748	772.709	242.701	7.88964	47.9472	274.181	32.2181	198.978	22.4094	143.928	120.165	6733.17	13059.4	14675.7	1442.13	1745.32	627.356	1936.86	20.0286	11.9655	15467.6	709.864	0.716087	8623.13	15775.1	5264.46	1669.39	15.7181	12.1597	1.25268	141.867	134.423	0	230070
		ave		423.184	41.1601	480.133	821.819	26.9242	72.2844	17.4862	218.658	557.195	478.17	771.799	242.424	7.74525	48.1574	273.915	32.7683	199.567	22.3769	144.06	119.561	6668.54	13036.1	14647.7	1434.63	1751.38	605.12	1939.22	20.0587	11.9915	14591.7	928.463	0.773047	8656.77	15792	5253.24	2010.3	15.7587	14.3771	1.33331	168.703	143.931	0	228778
control	biom 60-yrs		26280	553.759	49.4597	540.626	860.007	26.1797	58.8963	20.49	244.581	554.328	535.32	843.611	268.728	18.137	41.9737	300.587	15.6674	162.825	23.1627	137.346	167.038	10243.6	13843.1	13519.9	1814.05	1421.17	665.388	2018.6	19.7203	11.8655	50403.7	0.031375	0.493274	6722.05	16989.9	5916.56	805.94	1405.32	5.91123	0.49597	65.9998	146.719	0	335141
			26645	554.058	50.0051	540.61	857.763	25.9614	58.493	20.5401	245.059	554.1	537.137	844.485	269.444	18.4492	41.5858	300.189	15.1788	161.835	23.1673	136.844	167.853	10318.9	13832.8	13573.5	1801.71	1407.1	659.715	2011.62	19.7076	11.9226	51401.5	0.00193	0.484887	6660.62	17030.6	5938.98	851.291	1411.64	5.14826	0.423879	57.1243	152.348	0	338948
			26999.5	546.309	50.0591	533.889	844.416	25.507	57.6774	20.3823	243.214	547.49	534.176	837.019	266.948	18.5995	40.2233	295.343	14.545	159.432	22.9425	135.027	168.52	10396.6	13830.1	13627.2	1793.37	1394.07	653.398	1997.63	19.6869	11.9825	52504.9	0.000148	0.572925	6601.53	17053.4	5954.47	911.432	1418.24	5.34635	0.432561	59.3211	147.786	0	342022
		ave		551.375	49.8413	538.375	854.062	25.8827	58.3556	20.4708	244.285	551.973	535.544	841.705	268.373	18.3952	41.2609	298.706	15.1304	161.364	23.0908	136.405	167.804	10319.7	13835.3	13573.5	1803.04	1407.45	659.5	2009.28	19.705	11.9235	51436.7	0.011151	0.517029	6661.4	17024.6	5936.67	856.221	1411.73	5.46861	0.450803	60.8151	148.951	0	338704
Climate Change	biom 30-yrs		13870	417.939	39.6561	472.952	804.401	25.5461	72.2549	17.7359	219.097	556.289	484.736	773.112	238.13	7.31067	48.0223	272.069	32.7691	197.102	21.95	142.56	116.114	4720.01	11954.2	14257.3	1417.78	1741.56	471.241	1859.92	20.2298	11.8514	13283.3	790.567	0.714394	8828.95	15861.5	5239.79	2481.82	16.0044	12.3223	0.92173	145.345	117.097	0	230580
			14235	419.656	39.683	471.951	804.951	25.4208	72.1184	17.7015	218.577	555.074	482.684	771.295	238.575	7.55535	47.6541	272.236	31.9268	195.764	21.9818	142.447	117.004	4795.6	12039.1	14235	1420.96	1767.06	487.487	1869.5	20.2631	11.7902	13513.7	351.773	0.535531	8775.66	15958.4	5293.66	1570.8	15.7678	9.49056	0.629817	110.606	104.514	0	234381
			14600	425.446	39.5798	471.047	805.071	25.2786	71.9412	17.6319	217.78	553.792	480.59	768.127	238.849	7.79521	47.2503	272.473	30.9917	194.368	22.0212	142.141	117.93	4611.69	12014.7	14056	1436.29	1750.9	472.42	1873.95	20.2691	11.7092	15046.1	1961.96	1.23673	8724.69	16038.1	5341.65	878.468	15.3375	7.47559	1.72692	97.0272	144.162	0	236800
		ave		421.014	39.6396	471.983	804.807	25.4151	72.1048	17.6898	218.485	555.052	482.67	770.844	238.518	7.55374	47.6422	272.259	31.8959	195.745	21.9844	142.383	117.016	4709.1	12002.7	14182.8	1425.01	1753.17	477.049	1867.79	20.254	11.7836	13947.7	1034.77	0.828884	8776.43	15952.7	5291.7	1643.7	15.7032	9.76281	1.09282	117.659	121.924	0	233920
Climate Change	biom 60-yrs		26280	358.221	41.5268	419.28	789.503	16.8137	62.5909	17.6869	229.176	589.061	508.31	722.716	224.617	15.0164	40.4024	270.702	21.6497	166.092	21.351	133.301	151.033	0.009408	11.8584	16449.9	1448.34	1488.03	441.838	1537.69	25.234	5.02316	24165.1	2896.72	4.81912	7802.28	23020.2	7239.88	216.065	10.6511	2.69215	0.354213	28.3826	138.795	0	337877
			26645	354.895	41.4072	419.032	790.376	16.5687	62.4597	17.7051	229.157	589.411	507.79	720.14	224.545	15.1093	40.2727	271.873	21.4173	164.853	21.3686	132.445	152.063	0.003622	8.02219	16569	1452.44	1479.21	442.704	1538.32	25.2531	5.02317	23473.8	2772.53	4.59749	7781.02	23047.1	7240.32	284.903	10.5905	3.41995	0.371063	37.0273	143.042	0	342988
			26999.5	350.116	40.8316	415.166	781.649	16.2103	61.8917	17.5517	226.882	582.044	502.763	709.733	221.783	15.0712	39.1282	269.078	20.9746	162.314	21.169	130.305	152.973	0.001151	4.91646	16692.5	1459.63	1470.99	443.805	1539.7	25.2722	5.02115	23459.2	2711.19	4.51011	7761.37	23074.2	7240.21	260.384	10.4461	2.97242	0.35264	31.9206	138.321	0	346659
		ave		354.411	41.2552	417.826	787.176	16.5309	62.3141	17.6479	228.405	586.839	506.288	717.53	223.648	15.0656	39.9344	270.551	21.3472	164.419	21.2962	132.017	152.023	0.004727	8.2657	16570.5	1453.47	1479.41	442.782	1538.57	25.2531	5.0225	23699.3	2793.48	4.64224	7781.56	23047.2	7240.13	253.784	10.5626	3.02817	0.359305	32.4435	140.052	0	342508
LBSP	biom 30-yrs		13870	323.301	38.2653	442.724	766.965	29.7728	75.2098	17.669	216.606	564.012	478.465	803.432	244.233	7.86859	45.6956	240.12	29.2277	214.703	22.4099	150.369	146.116	8810.61	17068.5	23222.7	1402.43	1907.3	1549.17	2500.48	19.8585	13.0467	13074.2	2255.16	1.18937	8973.99	15587.8	5364.8	4672.64	25.7775	53.0571	3.25002	665.242	177.117	0	491275
			14235	349.457	37.8996	439.717	763.811	29.6683	75.3044	17.6866	216.5	563.479	477.759	805.197	245	8.20643	45.711	239.644	28.9626	213.881	22.4339	150.578	147.98	9006.3	17202.6	23640.3	1404.23	1890.78	1480.49	2525.71	19.748	12.9938	12018.2	1534.21	0.845189	8897.71	15482.4	5390.02	6476.1	25.3082	16.7947	1.15595	204.019	118.342	0	490840
			14600	367.542	37.5866	436.585	760.451	29.5731	75.2753	17.6964	216.346	562.927	477.193	806.915	245.765	8.54569	45.8065	238.7	28.8022	213.336	22.4625	150.665	149.687	9224.62	17360.6	24208.9	1384.73	1915.61	1425.2	2532.39	19.7965	12.955	11296.8	60.5093	0.267577	8829.03	15650.3	5450.17	3981.97	24.8294	18.2805	0.779701	210.869	118.704	0	493313
		ave		346.767	37.9172	439.675	763.742	29.6714	75.2632	17.684	216.484	563.472	477.805	805.181	244.999	8.2069	45.7377	239.488	28.9975	213.973	22.4354	150.537	147.927	9013.84	17210.6	23690.6	1397.13	1904.56	1484.95	2519.53	19.801	12.9985	12129.7	1283.29	0.767379	8900.24	15573.5	5401.66	5043.57	25.305	29.3774	1.72856	360.043	138.054	0	491809
LBSP	biom 60-yrs		26280	603.217	42.6292	499.705	797.095	31.2838	58.141	19.9481	237.617	554.884	513.79	879.07	281.643	19.9404	43.212	274.92	16.9803	189.232	22.797	144.816	170.303	13891.5	18742.7	32945.6	1784.82	1545.48	823.662	2270.58	18.1132	13.0449	55390.8	1.3e-05	0.250527	6431.53	15568.2	5562.86	685.262	3.34691	6.96442	0.312218	75.2102	162.459	0	586856
			26645	606.872	43.1742	502.865	800.76	31.0586	57.8571	20.0213	238.135	553.934	515.457	880.549	283.227	20.2566	43.0101	276.272	16.5171	186.384	22.7844	143.591	169.969	13977.9	18710.3	32568	1801.41	1519.05	780.79	2245.9	18.0254	13.0809	57653.4	1.3e-05	0.25458	6362.59	15502.9	5544.81	714.896	2.9954	6.59552	0.299279	71.861	158.433	0	585409
			26999.5	602.248	43.2436	499.804	793.042	30.5383	57.1741	19.8864	236.319	546.621	512.429	873.008	281.463	20.3899	41.8313	273.169	15.8995	181.829	22.5518	141.029	169.517	14066.3	18684.4	32193	1803.11	1494.97	743.059	2220.6	17.9407	13.1198	57057.8	1.3e-05	0.320903	6297.55	15441.1	5527.13	711.479	2.5608	6.53452	0.292547	70.1493	169.557	0	586270
		ave		604.112	43.0157	500.791	796.966	30.9602	57.7241	19.952	237.357	551.813	513.892	877.542	282.111	20.1957	42.6845	274.787	16.4656	185.815	22.7111	143.146	169.929	13978.6	18712.5	32568.8	1796.45	1519.83	782.504	2245.7	18.0264	13.0819	56700.7	1.3e-05	0.275337	6363.89	15504.1	5544.93	703.879	2.96771	6.69815	0.301348	72.4068	163.483	0	586178
Fishery	biom 30-yrs		13870	381.61	41.2302	498.043	374.402	5.23023	74.6948	15.6517	64.4464	559.273	353.902	745.404	161.686	0.008044	37.4095	235.029	48.1496	129.096	22.5391	18.7751	166.187	6446.01	12901.8	15091.2	1410.32	1721.47	849.921	2040.14	19.4571	12.0974	12024.6	150.465	0.38845	8861.81	14747.6	5243.69	2533.9	15.116	12.6468	0.677793	146.668	97.5836	0	219620
			14235	392.702	41.0526	497.754	373.947	5.22014	74.5134	15.6135	64.2584	558.124	352.774	744.466	161.967	0.008845	37.1693	235.597	47.3073	129.62	22.6058	18.6919	170.189	6575.03	12942.9	14930.3	1441.37	1704.94	853.168	2036.78	19.3492	12.0424	14014.6	305.037	0.461313	8782.93	14641.6	5252.35	2177.18	15.0247	10.9034	0.69569	127.89	106.641	0	222325
			14600	391.603	41.0206	497.66	373.651	5.20685	74.2561	15.5752	64.0871	557.457	351.84	744.081	162.231	0.008358	36.9252	236.14	46.4007	129.968	22.6692	18.6116	174.323	6707.59	12996.9	15096.6	1453.44	1695.69	938.095	2048.4	19.2896	11.9963	14379.2	1606.95	0.908659	8726.53	14617.6	5290.57	1528.66	14.7134	10.3536	1.1783	126.109	123.436	0	223538
		ave		388.638	41.0366	497.707	373.799	5.21349	74.3847	15.5943	64.1728	557.791	352.307	744.274	162.099	0.0086015	37.0472	235.869	46.854	129.794	22.6375	18.6518	172.256	6641.31	12969.9	15013.5	1447.4	1700.32	895.631	2042.59	19.3194	12.0193	14196.9	955.992	0.684986	8754.73	14629.6	5271.46	1852.92	14.869	10.6285	0.936994	127	115.039	0	222932
Fishery	biom 60-yrs		26280	498.782	49.3413	571.775	394.277	5.43162	60.3807	17.5918	60.9306	548.511	376.898	810.768	169.388	0.007495	35.4386	257.842	27.3003	119.029	23.5696	17.4564	297.798	10225.7	13741.5	14743.3	1919.1	1364.33	1014.95	2136.67	18.9262	12.0152	47908.9	6.93752	0.320038	6683.95	15901.5	5836.48	583.204	229.476	4.84278	0.353032	53.0636	137.546	0	327799
			26645	502.792	49.8883	572.734	393.685	5.39673	59.975	17.6221	60.7052	547.76	377.645	811.642	169.587	0.008261	35.3312	257.494	26.833	118.306	23.5727	17.3966	299.629	10305.4	13736.1	14797.3	1907.98	1353.36	1003.42	2134.6	18.9179	12.0739	49069.3	16.9001	0.445285	6666.27	15922.8	5856.82	662.532	230.396	4.58595	0.363522	50.7061	140.096	0	331746
			26999.5	498.636	49.9443	566.834	388.505	5.32084	59.1397	17.4846	60.0746	540.847	375.224	804.626	167.945	0.009105	34.5438	253.302	26.0374	116.682	23.3521	17.1991	301.083	10391.5	13747.6	14848.2	1893.98	1342.19	990.839	2123.63	18.9112	12.1379	49329.9	26.3585	0.465514	6614.04	15957	5878.5	565.737	230.2	4.39625	0.330406	48.1331	136.763	0	335609
		ave		500.07	49.9163	569.784	391.095	5.35879	59.5573	17.5534	60.3899	544.303	376.435	808.134	168.766	0.008683	34.9375	255.398	26.4352	117.494	23.4624	17.2978	300.356	10348.4	13741.8	14822.8	1900.98	1347.78	997.129	2129.12	18.9145	12.1059	49199.6	21.6293	0.455399	6640.15	15939.9	5867.66	614.134	230.298	4.4911	0.346964	49.4196	138.429	0	333677
HIGH Phytoplankton Growth Rate
control	biom 30-yrs		13870	357.506	41.1837	384.269	783.672	37.3677	75.3865	15.943	213.685	569.613	478.915	689.354	222.538	6.88535	53.9385	271.609	45.6152	242.917	22.7596	156.721	135.616	3023.23	8341.53	30320.5	1204.56	2115.43	1984.43	2645.89	17.5943	11.0946	7442.2	4458.45	1.5423	9552.96	12799.8	2941.1	547.739	19.4229	8.09938	0.977524	100.478	106.344	0	6609.03
			14235	364.3	40.9049	380.236	779.893	37.3553	75.3553	15.9321	213.218	568.685	478.194	688.9	222.261	7.13258	53.8168	270.37	45.4952	241.762	22.7643	156.928	136.759	3061.61	8382.88	31274.3	1183.78	2089.82	2019.64	2657.2	17.5094	11.0198	7582.81	4534.87	1.37466	9496.69	12723.5	2951.04	565.433	18.9276	8.28573	1.00208	102.997	108.899	0	5195.16
			14600	372.603	40.6347	376.822	776.46	37.3377	75.2458	15.9106	212.722	567.792	477.62	688.464	221.953	7.37757	53.6433	269.507	45.3621	240.829	22.7747	156.993	137.93	3097.24	8422.05	32470.7	1165.38	2084.67	2082.61	2669.74	17.4202	10.9459	7714.05	4093.76	1.33363	9440.07	12641	2959.93	626.527	18.5107	8.75771	1.02582	108.361	110.245	0	3730.47
	B0	ave		368.452	40.7698	378.529	778.176	37.3465	75.3005	15.9213	212.97	568.239	477.907	688.682	222.107	7.25508	53.73	269.939	45.4286	241.296	22.7695	156.96	137.344	3079.42	8402.47	31872.5	1174.58	2087.24	2051.13	2663.47	17.4648	10.9829	7648.43	4314.32	1.35415	9468.38	12682.3	2955.48	595.98	18.7191	8.52172	1.01395	105.679	109.572	0	4462.81
control	biom 60-yrs		26280	1221.42	36.4589	399.825	803.443	37.1634	78.0013	15.4327	203.533	536.19	461.506	701.459	220.751	15.3033	54.5414	286.264	42.5956	246.295	23.945	162.808	191.866	4825.9	10032.6	57582.8	1498.94	1938.08	2170.74	3255.53	14.1009	9.31485	31198.5	667.217	0.478285	8328.56	9172.14	3010.21	1345.44	10.5898	14.3051	1.24606	166.533	204.83	0	3021.89
			26645	1251.32	36.4663	402.573	806.581	37.2756	78.0928	15.4253	203.214	534.882	460.853	701.609	220.651	15.5261	54.6322	287.575	42.7806	246.966	23.989	162.747	194.118	4904.73	10096.6	58159.6	1515.79	1939.8	2163.86	3259.99	14.0177	9.29017	32444.3	648.284	0.469966	8288.42	9096.74	3019.04	1365.65	10.4297	14.5487	1.24208	169.828	206.357	0	3264.83
			26999.5	1274.16	36.1362	401.238	800.098	37.0711	77.54	15.2711	201.02	527.614	456.242	694.987	217.907	15.6108	53.4804	284.601	42.4311	245.337	23.801	161.136	196.298	4983.28	10160.8	58728.2	1534.77	1941.54	2159.1	3266.76	13.9436	9.26711	33701.2	667.142	0.553365	8250.34	9029.06	3029.38	1387.56	10.2716	15.7534	1.31535	181.771	214.255	0	3009.15
		ave		1248.97	36.3538	401.212	803.374	37.17	77.878	15.3763	202.589	532.895	459.534	699.352	219.77	15.4801	54.218	286.146	42.6025	246.199	23.9117	162.23	194.094	4904.64	10096.7	58156.9	1516.5	1939.81	2164.57	3260.76	14.0207	9.29071	32448	660.881	0.500539	8289.11	9099.31	3019.54	1366.22	10.4304	14.8691	1.26783	172.711	208.48	0	3098.62
Climate Change	biom 30-yrs		13870	353.401	41.0444	382.762	782.516	37.1726	75.221	15.9118	212.985	568.631	478.5	686.495	221.822	6.8686	53.8346	271.742	45.3746	242.282	22.6665	156.363	135.129	2324.88	7878.37	29623.1	1243.8	2060.27	1880.16	2630.13	17.599	10.9624	7453.66	4178.42	1.4109	9571.94	12792.3	2933.5	595.987	19.3741	8.54935	1.01117	105.732	107.681	0	10218.3
			14235	358.524	41.0125	379.011	779.092	37.1579	75.1951	15.9172	213.036	567.635	478.113	687.476	221.48	7.11513	53.7504	270.561	45.298	241.446	22.6665	156.654	136.376	2318.14	7891.38	30362.6	1216.57	2050.92	1907.34	2634.89	17.5082	10.8816	7601.46	3735.61	1.29382	9517.06	12706.3	2943.08	680.382	18.9361	9.16007	1.05584	113.013	110.011	0	10096.4
			14600	368.286	40.8738	376.503	776.776	37.1707	75.1276	15.9066	212.756	566.581	477.723	687.425	221.053	7.36067	53.7013	270.189	45.27	240.714	22.6792	156.759	137.599	2191.28	7863.65	31371.5	1194.78	2045.74	1952.39	2637.09	17.4407	10.7886	7718.28	3859.36	1.29811	9477.21	12653.2	2959.8	638.168	18.4706	8.85242	1.0269	109.035	110.425	0	8002.95
		ave		360.07	40.9769	379.425	779.461	37.1671	75.1812	15.9119	212.926	567.616	478.112	687.132	221.452	7.1148	53.7621	270.831	45.3142	241.481	22.6707	156.592	136.368	2278.1	7877.8	30452.4	1218.38	2052.31	1913.3	2634.04	17.516	10.8776	7591.13	3924.46	1.33428	9522.07	12717.3	2945.46	638.179	18.9269	8.85395	1.0313	109.26	109.372	0	9439.23
Climate Change	biom 60-yrs		26280	1025.98	48.9244	436.557	875.355	40.0921	79.5385	14.6657	205.327	562.234	462.987	634.063	216.304	15.6261	62.1447	294.518	52.0143	252.072	22.4305	158.044	185.698	0.002484	2.79644	68512.2	1485.09	1909.99	2166.69	3264.9	15.1361	5.83432	22547.4	1212.3	0.619291	8955.13	9977.85	3257.91	918.072	12.2255	11.401	1.1099	130.504	238.804	0	3548.12
			26645	1055.6	48.4321	440.681	879.021	40.1063	79.7285	14.6664	205.247	561.415	462.225	634.179	216.203	15.8736	62.2333	296.113	52.211	252.188	22.4564	157.483	187.755	0.001094	1.844	69636.4	1499.5	1912.92	2166.76	3281.27	15.062	5.84366	23582.1	1142.58	0.594089	8922.75	9899.85	3270.07	913.695	12.0999	11.3101	1.08781	129.937	236.245	0	3689.04
			26999.5	1067.47	47.3969	439.487	871.042	39.7351	79.238	14.5218	203.086	553.32	457.413	627.354	213.496	15.9828	61.0133	292.952	51.7306	250.024	22.2502	155.322	189.6	0.00041	1.10877	70709.1	1511.76	1915.19	2165.3	3291.82	14.9937	5.85378	24638	1081.51	0.647308	8892.39	9826.57	3283.18	907.713	11.9679	11.1411	1.0675	127.981	232.933	0	3530.88
		ave		1049.68	48.2512	438.908	875.139	39.9778	79.5017	14.618	204.553	558.99	460.875	631.866	215.334	15.8275	61.7971	294.528	51.9853	251.428	22.379	156.95	187.684	0.00132933	1.91641	69619.2	1498.78	1912.7	2166.25	3279.33	15.0639	5.84392	23589.2	1145.46	0.620229	8923.42	9901.42	3270.39	913.16	12.0978	11.2841	1.08841	129.474	235.994	0	3589.35
				0.191807	0.00881687	0.0802012	0.159913	0.0073051	0.0145272	0.00267112	0.0373777	0.102143	0.0842152	0.11546	0.0393478	0.00289214	0.0112921	0.0538187	0.00949921	0.0459432	0.00408929	0.0286792		3272.31	18824.8	0.173829
LBSP	biom 30-yrs			NO DATA
LBSP	biom 60-yrs			NO DATA
Fishery	biom 30-yrs		13870	303.359	41.6632	414.295	366.169	6.70142	77.9784	14.3549	60.767	574.007	350.957	665.734	147.257	0.007107	40.4012	234.026	56.5449	143.39	23.0936	20.2388	187.945	3060.47	8389.24	29430	1220.15	2011.91	2205.4	2741.96	16.572	11.182	7011.56	4153.88	1.40076	9676.85	11297.1	2919.73	573.641	17.8188	8.19259	0.937781	101.483	98.5631	0	8093.96
			14235	309.265	41.3823	410.439	364.856	6.68082	78.0313	14.3321	60.7302	573.228	350.446	664.916	147.052	0.007576	40.2077	233.399	56.2177	143.864	23.1135	20.1667	192.126	3098.19	8429.15	30601.8	1197.01	2033.81	2326.37	2744.51	16.4503	11.1116	7142.53	6174.7	2.14931	9622.93	11177.4	2929.12	482.834	17.1249	8.24579	1.00443	102.638	106.951	0	3684.59
			14600	318.236	41.1219	406.67	363.64	6.66093	78.028	14.3098	60.6785	572.594	350.018	664.184	146.847	0.008339	40.1461	232.764	56.0962	144.283	23.1385	20.1076	196.397	3137.72	8475.85	31658.6	1176.69	2011.28	2377	2783.16	16.3501	11.0457	7248.88	3303.12	1.16496	9574.68	11076.7	2941.35	693.897	16.8637	8.89084	0.954011	109.284	99.1756	0	4799.25
		ave		310.287	41.2521	408.555	364.248	6.67088	78.0297	14.321	60.7044	572.911	350.232	664.55	146.949	0.0079575	40.1769	233.081	56.157	144.074	23.126	20.1371	194.261	3117.96	8452.5	31130.2	1186.85	2022.54	2351.68	2763.84	16.4002	11.0787	7195.7	4738.91	1.65714	9598.81	11127.1	2935.24	588.366	16.9943	8.56832	0.97922	105.961	103.063	0	4241.92
Fishery	biom 60-yrs		26280	1065.26	38.6003	433.49	377.886	6.45524	79.4221	13.5419	57.6134	545.064	334.655	673.768	144.438	0.007916	41.3205	246.625	55.11	150.51	24.2729	20.1989	336.282	5063.07	10330.8	57687.8	1523.75	1872.16	2499.21	3348.5	12.1975	9.6189	27423.9	661.866	0.475864	8438.61	6789.55	2961.48	1312.96	8.33371	13.7262	1.13772	159.971	186.676	0	2157.3
			26645	1096.49	39.0136	439.038	380.627	6.4707	79.5691	13.5498	57.5659	544.206	334.362	674.245	144.426	0.008747	41.4153	247.759	54.9792	150.469	24.3129	20.1967	340.138	5150.46	10400.6	58273.2	1539.24	1872.15	2488.23	3353.79	12.0902	9.60272	28647.5	670.795	0.480665	8400.79	6689.74	2963.16	1382.96	8.20707	15.3139	1.17517	192.925	192.625	0	2298.86
			26999.5	1137.28	39.1101	440.454	379.973	6.44896	79.0549	13.4405	57.109	537.384	331.337	668.24	142.828	0.008188	40.6664	245.432	54.1971	149.19	24.1173	20.0352	343.649	5237.81	10471.6	58866.4	1564.55	1877.72	2480.75	3364.24	11.99	9.58942	30344.7	632.874	0.534739	8366.04	6594	2966.12	1362.26	8.08216	14.1549	1.12255	164.708	192.096	0	1822.69
		ave		1099.68	39.0618	439.746	380.3	6.45983	79.312	13.4952	57.3375	540.795	332.85	671.243	143.627	0.0084675	41.0409	246.595	54.5882	149.83	24.2151	20.1159	341.893	5194.13	10436.1	58569.8	1551.9	1874.93	2484.49	3359.01	12.0401	9.59607	29496.1	651.834	0.507702	8383.41	6641.87	2964.64	1372.61	8.14462	14.7344	1.14886	178.817	192.361	0	2060.77
